# Supplementary material for: Previous Solid Organ Transplantation Influences Both Cancer Treatment and Survival Among Colorectal Cancer Patients
Source: PubMed Central journal article supplement (PMC11449720; doi:10.3389/ti.2024.13173), 2024-09-20
Supplement: DataSheet1.pdf [file DataSheet1.pdf]

## SUPPLEMENTARY MATERIAL

**Table S1.** Surgery codes used for identifying solid organ transplantation in medical history prior to colorectal cancer diagnosis.

**Table S2.** Characteristics of stage I-III rectal cancer patients treated with abdominal surgery, by medical history of solid organ transplantation. The odds ratios (OR) compare organ transplant recipients (OTRs) to non-transplanted cancer patients (No Tx) with respect to rectal cancer characteristics (location, tumor grade, number of lymph nodes examined) and treatment.

**Table S3.** Characteristics of stage IV colorectal cancer patients treated with abdominal surgery, stratified by medical history of solid organ transplantation.

**Table S4.** Characteristics of colorectal cancer patients not treated with potentially curative surgery such as either abdominal surgery or endoscopic polypectomy (i.e., patients deemed non-operable, and patients with distant metastases), by medical history of solid organ transplantation.

**Table S5.** Charlson Comorbidity Index (CCI) score distribution among colorectal cancer patients, by medical history of solid organ transplantation.

**Table S1.** Surgery codes used for identifying solid organ transplantation in medical history prior to colorectal cancer diagnosis.

| <b>Type of transplant</b> | <b>Codes used</b>                                    |
|---------------------------|------------------------------------------------------|
| Kidney                    | KAS10, KAS20, 6070                                   |
| Liver                     | JJC00, JJC10, JJC20, JJC30, JJC40, 5200, 5202        |
| Pancreas                  | JLE00, JLE03, JLE10, JLE16, JLE20, JLE30, 5530, 5531 |
| Heart                     | FQA00, FQA10, FQA20, FQA30, FQA40, FQA96, 3085       |
| Heart and lung            | FQB00, FQB10, FQB20, FQB30, FQB96, 6085              |
| Lung                      | GDG00, GDG03, GDG10, GDG13, GDG30, GDG96, 3590       |
| Bowel                     | JFE00                                                |

**Table S2.** Characteristics of stage I-III rectal cancer patients treated with abdominal surgery, by medical history of solid organ transplantation. The odds ratios (OR) compare organ transplant recipients (OTRs) to non-transplanted cancer patients (No Tx) with respect to rectal cancer characteristics (location, tumor grade, number of lymph nodes examined) and treatment.

| Characteristics <sup>1</sup>                | Rectal cancer |          |                          |         |
|---------------------------------------------|---------------|----------|--------------------------|---------|
|                                             | OTRs          | No Tx    | OR <sup>2</sup> (95% CI) | p-value |
|                                             | N (%)         | N (%)    |                          |         |
| <b>Total</b>                                | 10 (100)      | 74 (100) |                          |         |
| <b>Cancer location (cm from anal verge)</b> |               |          |                          | 0.30    |
| <6                                          | 4 (40)        | 21 (29)  | Base outcome             |         |
| 6-15                                        | 6 (60)        | 52 (71)  | 0.39 (0.07-2.29)         |         |
| <i>Missing</i>                              | 0             | 1        |                          |         |
| <b>Tumor grade</b>                          |               |          |                          | 0.48    |
| Low                                         | 7 (78)        | 51 (84)  | Base outcome             |         |
| High                                        | 2 (22)        | 10 (16)  | 2.35 (0.22-25.0)         |         |
| <i>Missing</i>                              | 1             | 13       |                          |         |
| <b>Perineural invasion</b>                  |               |          |                          | -       |
| Yes                                         | 0 (0)         | 6 (12)   | -                        |         |
| No                                          | 8 (100)       | 46 (88)  | Base outcome             |         |
| <i>Missing</i>                              | 2             | 22       |                          |         |
| <b>Lymph nodes examined</b>                 |               |          |                          | 0.03    |
| 0-11                                        | 6 (60)        | 22 (29)  | 7.47 (1.17-47.7)         |         |
| 12-53                                       | 4 (40)        | 51 (71)  | Base outcome             |         |
| <i>Missing</i>                              | 0             | 1        |                          |         |
| <b>Neoadjuvant (chemo)radiotherapy</b>      |               |          |                          | 0.45    |
| Yes <sup>3</sup>                            | 4 (40)        | 53 (72)  | 0.55 (0.11-2.66)         |         |
| No                                          | 6 (60)        | 21 (28)  | Base outcome             |         |
| <b>Postoperative MDT meeting</b>            |               |          |                          | -       |
| Yes                                         | 8 (100)       | 52 (88)  | -                        |         |
| No                                          | 0 (0)         | 7 (12)   | Base outcome             |         |
| <i>Missing</i>                              | 2             | 15       |                          |         |

Abbreviations: OTR, organ transplant recipient. Tx, transplantation. OR, odds ratio. CI, confidence interval. N, number. MDT, multidisciplinary team.

<sup>1</sup> Virtually all patients underwent microscopically radical surgery, and presented without tumor perforations, regardless of transplantation status; data not shown due to single observations. Data regarding adjuvant therapy, and stage-specific data regarding neoadjuvant (chemo)radiotherapy, also not shown due to single observations.

<sup>2</sup> All reported ORs refer to the contrast between OTRs and non-transplanted cancer patients (No Tx), where the latter constitute the reference group. The regression models were adjusted for the matching factors sex, age at diagnosis ( $\pm 1$  year), and year of cancer diagnosis, as well as region, cardiovascular comorbidity, attained level of education, and chronic dialysis at cancer diagnosis.

<sup>3</sup> Chemotherapy was administered to 0/4 transplanted patients, and 12/53 non-transplanted, in addition to radiotherapy. The frequency of neoadjuvant (chemo)radiotherapy administered was accordant with Swedish treatment practices (see reference no. 7 in the main article).

**Table S3.** Characteristics of stage IV colorectal cancer patients treated with abdominal surgery, stratified by medical history of solid organ transplantation.

| Characteristics <sup>1</sup>   | Colon cancer |          | Rectal cancer |         |
|--------------------------------|--------------|----------|---------------|---------|
|                                | OTRs         | No Tx    | OTRs          | No Tx   |
|                                | N (%)        | N (%)    | N (%)         | N (%)   |
| <b>Total</b>                   | 9 (100)      | 57 (100) | 4 (100)       | 8 (100) |
| <b>Metastases at diagnosis</b> |              |          |               |         |
| Liver                          | 4 (44)       | 26 (46)  | 2 (50)        | 5 (63)  |
| Lung or other                  | 4 (44)       | 33 (58)  | 0 (0)         | 2 (25)  |
| <b>Tumor grade</b>             |              |          |               |         |
| High                           | 4 (57)       | 17 (34)  | 0 (0)         | 2 (29)  |
| Low                            | 3 (43)       | 33 (66)  | 2 (100)       | 5 (71)  |
| <i>Missing</i>                 | 2            | 7        | 2             | 1       |
| <b>Neoadjuvant therapy</b>     |              |          |               |         |
| Any neoadjuvant therapy        | 0 (0)        | 6 (11)   | 0 (0)         | 4 (62)  |
| No neoadjuvant therapy         | 9 (100)      | 51 (89)  | 4 (100)       | 3 (38)  |
| <i>Missing</i>                 | 0            | 0        | 0             | 1       |

Abbreviations: OTR, organ transplant recipient. Tx, transplantation. N, number.

<sup>1</sup> Data regarding adjuvant therapy not shown due to single observations.

**Table S4.** Characteristics of colorectal cancer patients not treated with potentially curative surgery such as either abdominal surgery or endoscopic polypectomy (i.e., patients deemed non-operable, and patients with distant metastases), by medical history of solid organ transplantation.

| Characteristics                     | Colorectal cancer |           |
|-------------------------------------|-------------------|-----------|
|                                     | OTRs              | No Tx     |
|                                     | N (%)             | N (%)     |
| <b>Total</b>                        | 26 (100)          | 56 (100)  |
| <b>cTNM</b>                         |                   |           |
| <b>cT</b>                           |                   |           |
| cT1-3                               | 7 (27)            | 18 (32)   |
| cT4                                 | 7 (27)            | 11 (20)   |
| cTx                                 | 12 (46)           | 27 (48)   |
| <b>cN</b>                           |                   |           |
| cN0                                 | 6 (23)            | 7 (13)    |
| cN1-2                               | 6 (23)            | 21 (38)   |
| cNx                                 | 14 (54)           | 28 (50)   |
| <b>cM</b>                           |                   |           |
| cM0                                 | 8 (31)            | 11 (20)   |
| cM1                                 | 16 (62)           | 43 (77)   |
| cMx                                 | 2 (8)             | 2 (4)     |
| <b>Metastases (if cM1)</b>          |                   |           |
| Liver                               | 15 (94)           | 39 (91)   |
| Lung or other                       | 5 (31)            | 28 (65)   |
| <b>Planned palliative treatment</b> |                   |           |
| Yes                                 | 6 (50)            | 27 (71)   |
| No                                  | 6 (50)            | 11 (29)   |
| <i>Missing</i>                      | <i>14</i>         | <i>18</i> |

Abbreviations: OTR, organ transplant recipient. Tx, transplantation. N, number. cTNM, clinical tumor-node-metastasis stage.

**Table S5.** Charlson Comorbidity Index (CCI) score distribution among colorectal cancer patients, by medical history of solid organ transplantation.

| Characteristics                                 | No Tx     |                      | OTRs      |                       | All patients |
|-------------------------------------------------|-----------|----------------------|-----------|-----------------------|--------------|
|                                                 |           | Any Tx               | Kidney Tx | Other <sup>1</sup> Tx |              |
|                                                 | N (%)     | N (%)                | N (%)     | N (%)                 | N (%)        |
| <b>Total</b>                                    | 474 (100) | 98 (100)             | 75 (100)  | 23 (100)              | 572 (100)    |
| <b>Type of comorbidity (weighted CCI score)</b> |           |                      |           |                       |              |
| No comorbidity registered                       | 306 (65)  | 0 (0)                | 0 (0)     | 0 (0)                 | 318 (54)     |
| Cerebrovascular disease (1)                     | 25 (5)    | 9 (9)                | 9 (12)    | 0 (0)                 | 34 (6)       |
| Chronic obstructive pulmonary disease (1)       | 15 (3)    | 7 (7)                | 4 (5)     | 3 (13)                | 22 (4)       |
| Congestive heart failure (1)                    | 24 (5)    | 10 (10)              | 8 (11)    | 2 (9)                 | 34 (6)       |
| Dementia (1)                                    | 0 (0)     | 0 (0)                | 0 (0)     | 0 (0)                 | 0 (0)        |
| Diabetes (1)                                    | 0 (0)     | 0 (0)                | 0 (0)     | 0 (0)                 | 0 (0)        |
| Mild/severe liver disease (1/3)                 | 2 (0)     | 15 (15)              | 5 (7)     | 10 (43)               | 17 (3)       |
| Myocardial infarction (1)                       | 21 (4)    | 14 (14)              | 11 (15)   | 3 (13)                | 35 (6)       |
| Other chronic pulmonary disease (1)             | 11 (2)    | 2 (2)                | 2 (3)     | 0 (0)                 | 13 (2)       |
| Peptic ulcer (1)                                | 8 (2)     | 7 (7)                | 5 (7)     | 2 (9)                 | 15 (3)       |
| Peripheral vascular disease (1)                 | 12 (3)    | 7 (7)                | 5 (7)     | 2 (9)                 | 19 (3)       |
| Rheumatic disease (1)                           | 13 (3)    | 7 (7)                | 7 (9)     | 0 (0)                 | 20 (4)       |
| Diabetes with end organ damage (2)              | 19 (4)    | 15 (15)              | 12 (16)   | 3 (13)                | 34 (6)       |
| Hemiplegia (2)                                  | 2 (0)     | 2 (2)                | 2 (3)     | 0 (0)                 | 4 (1)        |
| Malignancy with or without metastases (2/6)     | 52 (11)   | 32 (33) <sup>2</sup> | 27 (36)   | 5 (22)                | 84 (15)      |
| Severe kidney disease (2)                       | 7 (1)     | 83 (85)              | 73 (97)   | 10 (43)               | 90 (16)      |
| Acquired immuno-deficiency syndrome (6)         | 7 (2)     | 2 (2)                | 0 (0)     | 2 (9)                 | 9 (2)        |
| <b>Sums of weighted CCI scores</b>              |           |                      |           |                       |              |
| 0                                               | 306 (65)  | 0 (0)                |           |                       |              |
| 1                                               | 47 (10)   | 5 (5)                |           |                       |              |
| 2                                               | 69 (15)   | 23 (23)              |           |                       |              |
| 3-4                                             | 31 (7)    | 37 (38)              |           |                       |              |
| 5-6                                             | 13 (3)    | 23 (23)              |           |                       |              |
| 7-10                                            | 8 (2)     | 10 (10)              |           |                       |              |

Abbreviations: OTR, organ transplant recipient. Tx, transplantation. CCI, Charlson comorbidity index.

<sup>1</sup> Liver, pancreas and kidney, heart, or lung transplantation.

<sup>2</sup> The overrepresentation of cancer history in transplanted patients was mainly driven by non-melanoma skin cancer.
